# Supplementary material for: Help! I need somebody: Help-seeking among workers with work-related mental disorders
Source: Research Square preprint supplement (doi:10.21203/rs.3.rs-2440139/v1), 2023-01-06
Supplement: Supplementary file 1 [file 489d92ae80d95dc864da60f7.pdf]

## Appendix F

### Trajectories of Participant Accessed Resources: A Sequential Overview

#### Participant 1 (Male, 41-50, Business, Finance, & Administration)

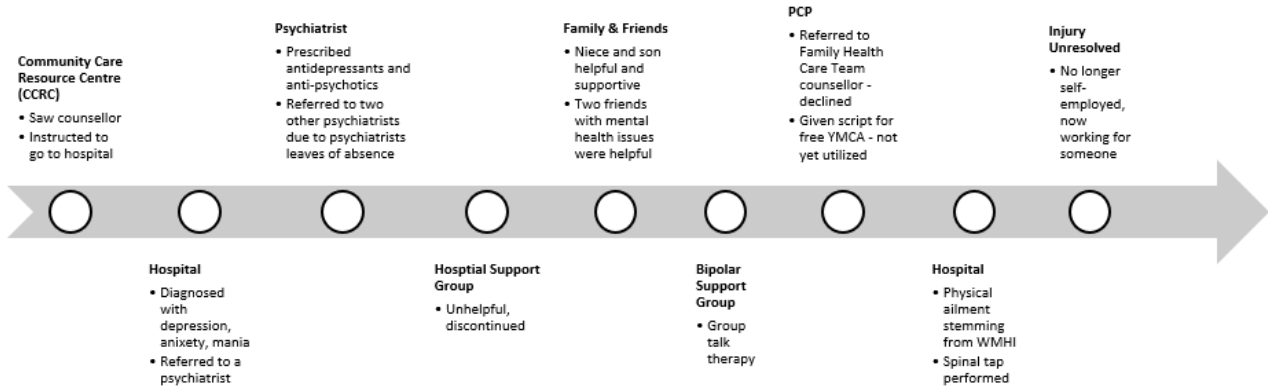

#### Participant 2 (Female, 51-60, Business, Finance, & Administration)

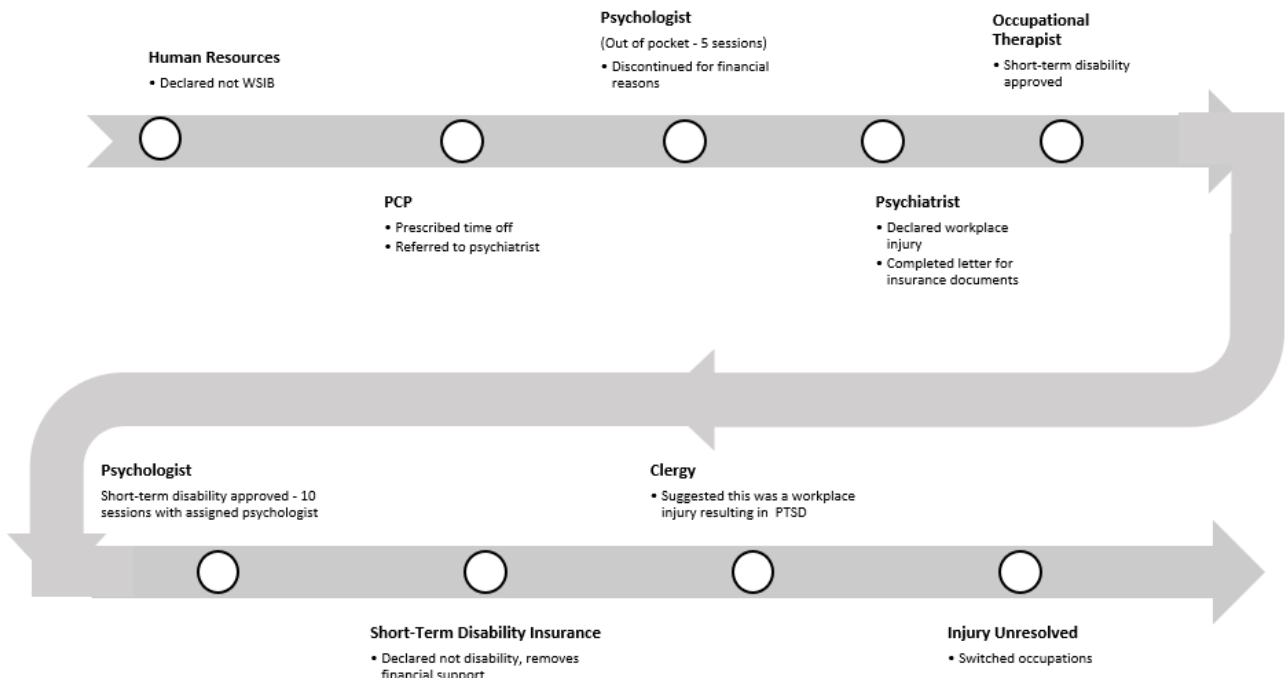

Participant 3 (Female, 41-50, Education, Law and Social, Community and Government Services)

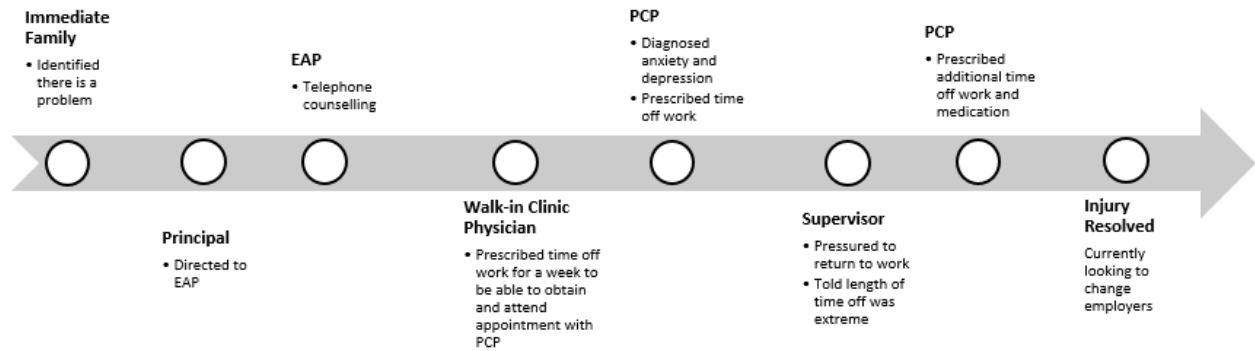

Participant 4 (Male, 41-50, Management)

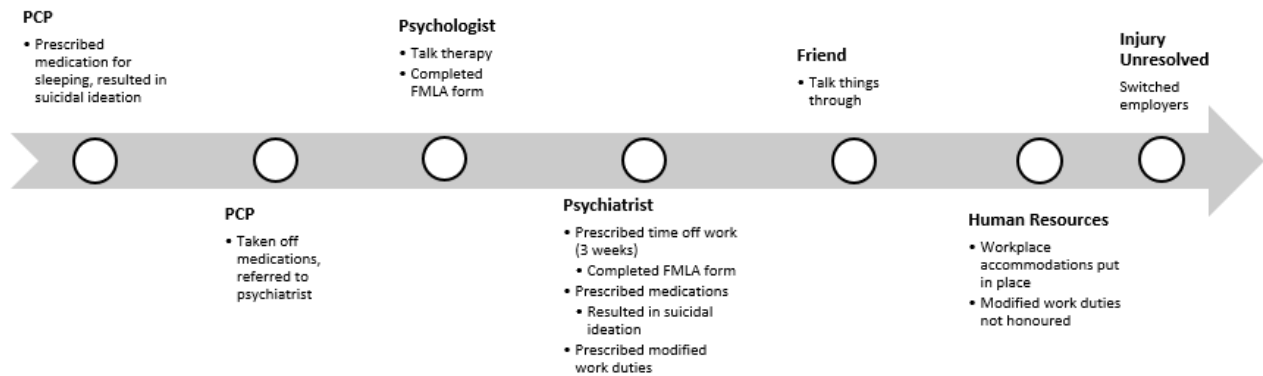

Participant 5 (Female, 41-50, Education, Law and Social, Community and Government Services)

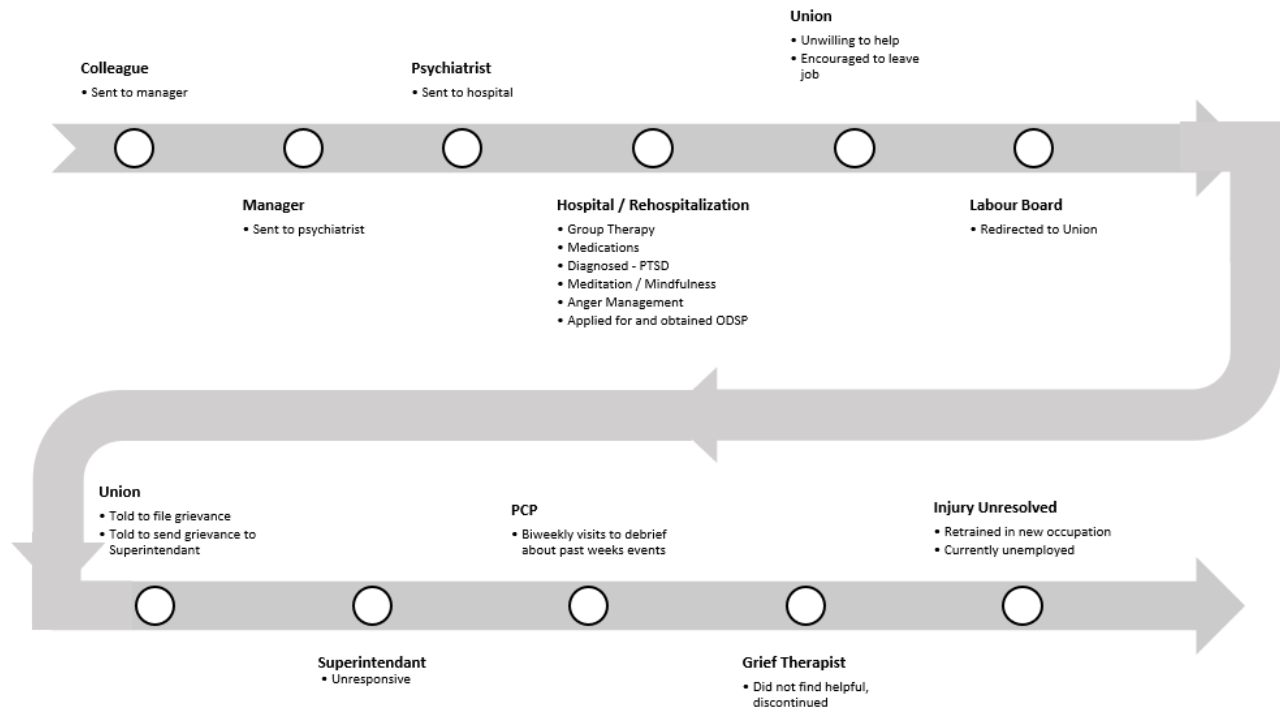

Participant 6 (Male, 31-40, Education, Law and Social, Community and Government Services)

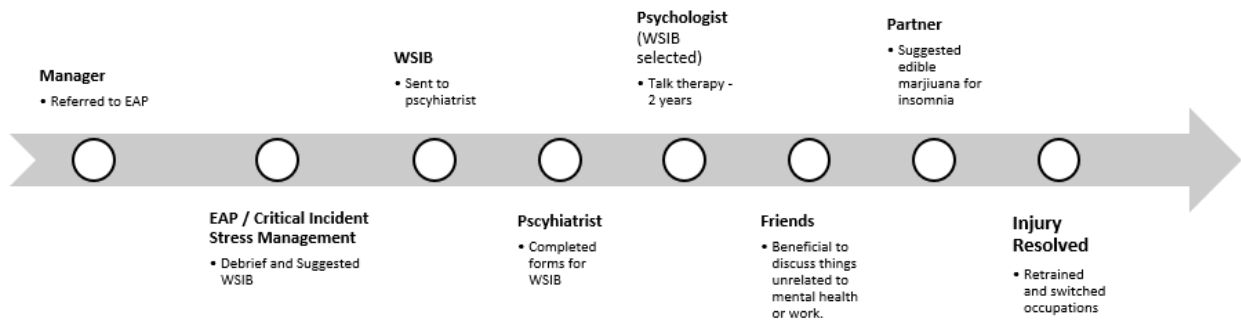

Participant 7 (Female, 51-60, Education, Law and Social, Community and Government Services)

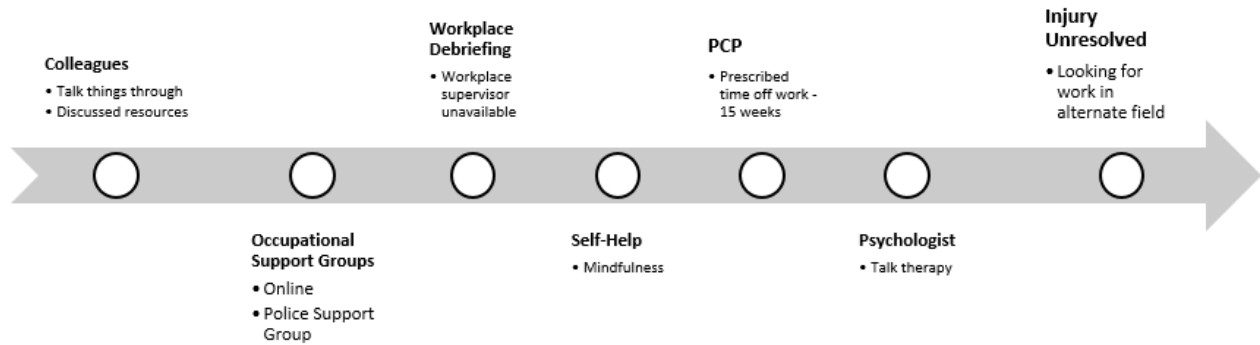

Participant 8 (Female, 21-30, Education, Law and Social, Community and Government Services)

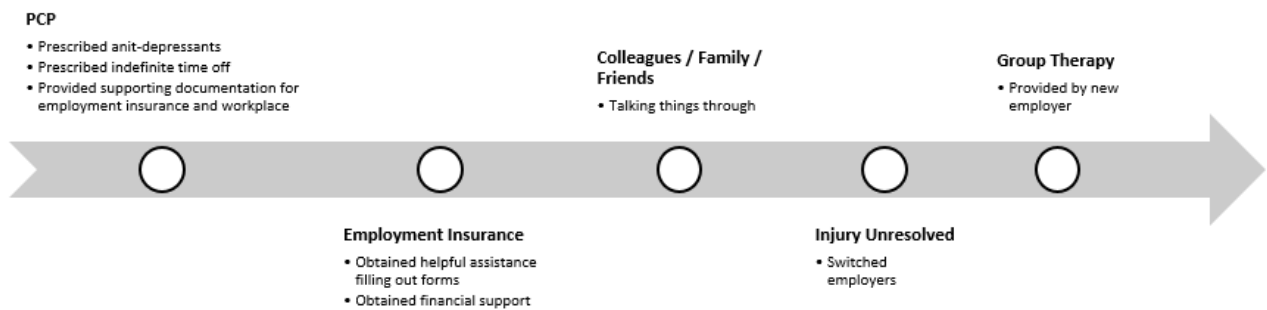

Participant 9 (Female, 41-50, Business, Finance, & Administration)

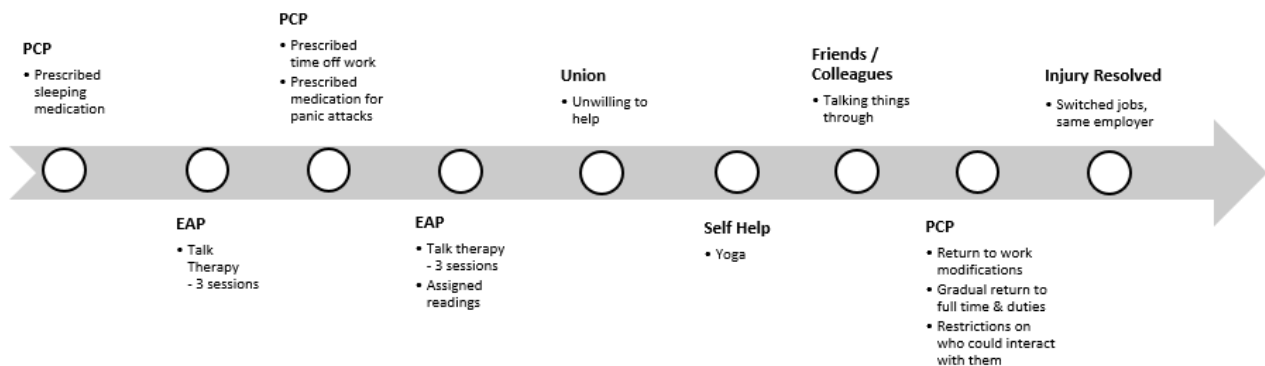

Participant 10 (Male, 41-50, Education, Law and Social, Community and Government Services)

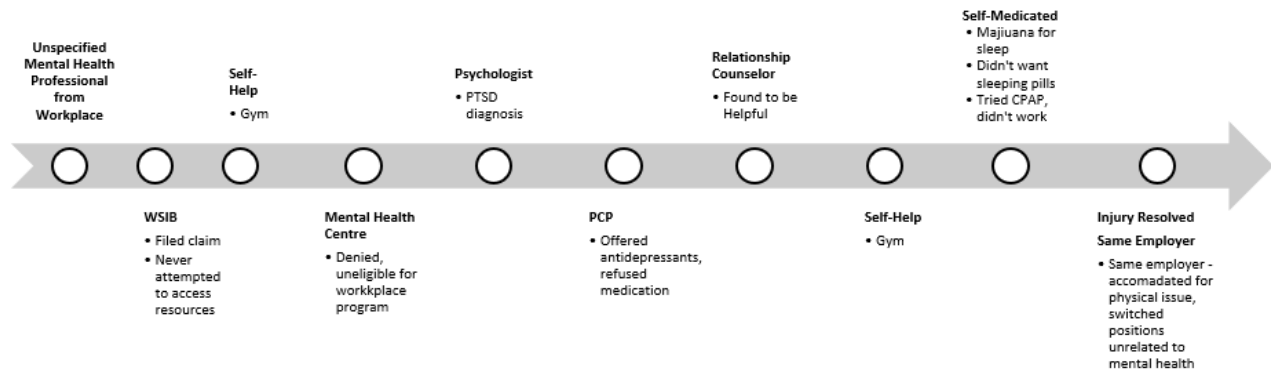

Participant 11 (Female, 31-40, Business, Finance, & Administration)

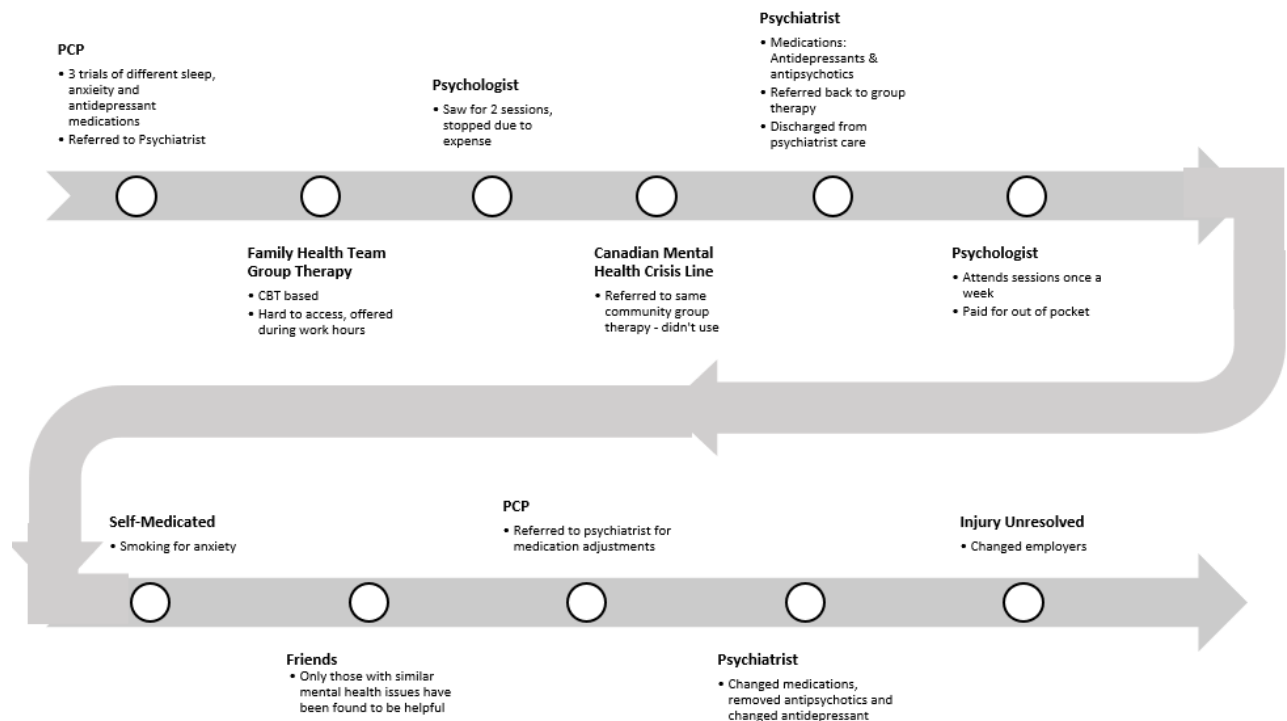

Participant 12 (Female, 41-50, Health)

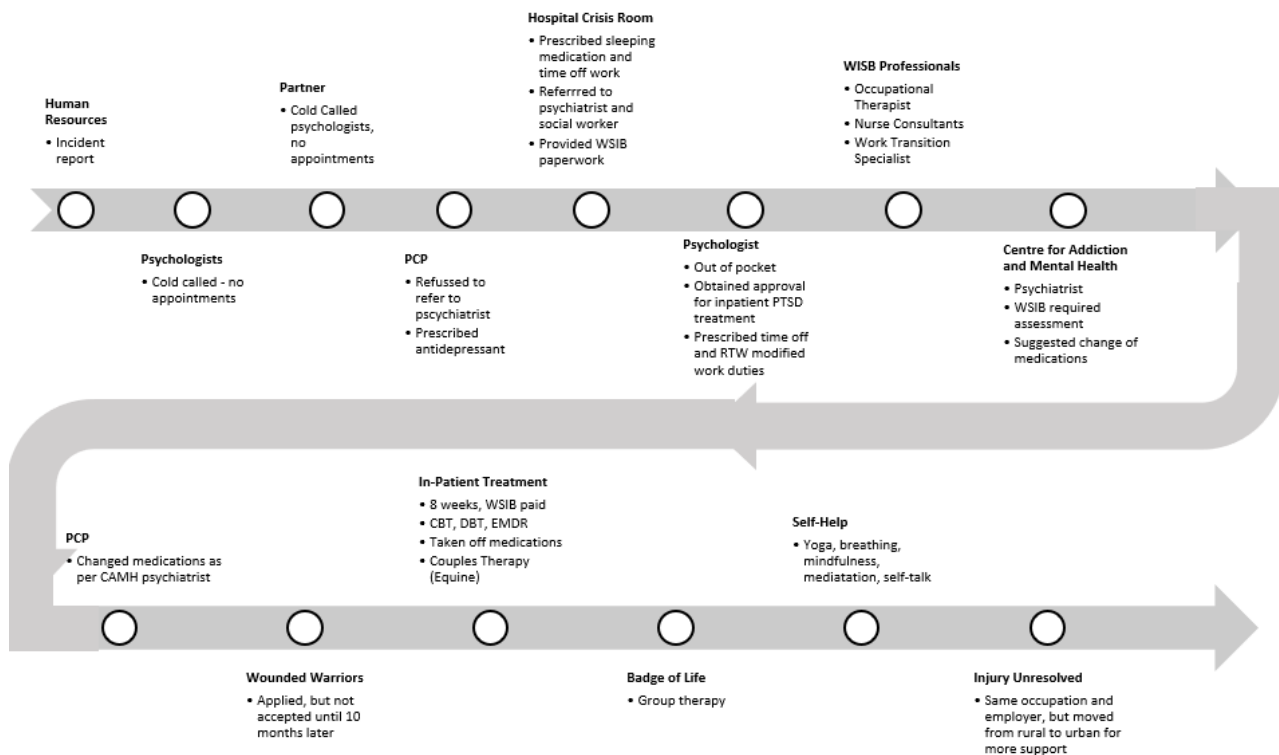

*Note.* CAMH = The Centre for Addiction and Mental Health; CBT = Cognitive behavioural therapy; CPAP = Continuous positive airway pressure; DBT = Dialectical behavioural therapy; EAP = Employee Assistance Program; EMDR = Eye movement desensitization and reprocessing; FMLA = Family and Medical Leave Act; ODSP = Ontario Disability Support Program; PCP = Primary care physician; PTSD = Post-traumatic stress disorder; RTW = Return to work; STD = Short-term disability; WSIB = Workplace Safety and Insurance Board
